# Supplementary material for: Zn-Proline catalyzed direct aldol reaction in aqueous mediaElectronic supplementary information (ESI) available: experimental details. See http://www.rsc.org/suppdata/cc/b3/b301117h/
Source: Royal Society of Chemistry journal article supplement (doi:10.1039/b301117h), 2003-03-31
Supplement: b301117h.doc [file b301117h.doc]

**Zn-Proline catalyzed direct Aldol reaction in aqueous media**

Tamis Darbre* and Miguel Machuqueiro

*Department of Chemistry and Biochemistry, University of Bern, Freiestrasse 3, CH-3012,*

*Switzerland. Tel: +41 31 6314375; E-mail:* [*darbre@ioc.unibe.ch*](mailto:darbre@ioc.unibe.ch)

Supporting Information

**General:** The reactants used were of *puriss.* grade. Solvents were distilled before use. 1H and 13C NMR spectra were recorded on Brucker Spectrospin AM300 spectrometer (1H, 300 MHz; 13C, 75 MHz). Chemical shifts are given in ppm referred to CHCl3. Coupling constants (J) are reported in Hertz (Hz) and 13C multiplicities are obtained from DEPT spectra. HPLC performed using a Waters system consisting of a Waters 600 Controler, a Waters 600 Pump and a Waters 996 Photodiode Array Detector. The chiral column used was the Chiralpak AS from Dancel Chemical Industries, Ltd. The assignment of the stereoisomers was obtained by comparing the retention time of our reaction product with the retention time obtained by the reaction with proline alone.

**General Procedure for the Preparation of the Zinc Complexes:** Triethylamine (0.6 ml) was added to a mixture of the corresponding amino acid (4.34 mmol) in methanol (10 ml). Complete solubilization was achieved with the help of ultrasound and (in some cases) with the addition of a small amount of water. The reaction mixture was stirred for 10 min and zinc acetate (2.17 mmol) was added. A white precipitate was readily formed and after 45 min it was collected by filtration to give the desired complex (23%-95% yields). These zinc complexes are characteristically insoluble in non-aqueous solvents.

**L-Pro2Zn:**

1H-NMR (300 MHz, D2O) : 1.81 (m, br, 3H); 2.22 (m, br, 1H); 2.98 (s, br, 1H); 3.14 (m, br, 1H); 3.85 (m, br, 1H) (Spectrum Included)

13C-NMR (75 MHz, D2O) : 25.74, 30.21, 47.59, 61.39.

**General Procedure for the Preparation of 4-Hydroxy-4-(4-nitro-phenyl)-butan-2-one (1):** A solution of the catalyst (5 mol) in water (1 ml; 66% vol./vol.) was added to a mixture of the 4-nitrobenzaldehyde (0.1 mmol) in acetone (0.5 ml). The resulting mixture stirred at room temperature for 24-96 h under N2 pressure in order to avoid evaporation. The mixture was dried under reduced pressure. Addition of CDCl3 and filtration of the non-soluble complex catalyst affords the desired product and 4-nitrobenzaldehyde (when present). The 1H-NMR spectra of the crude product obtained, with complete (figure 1S) and partial (figure 2S) conversion are included.


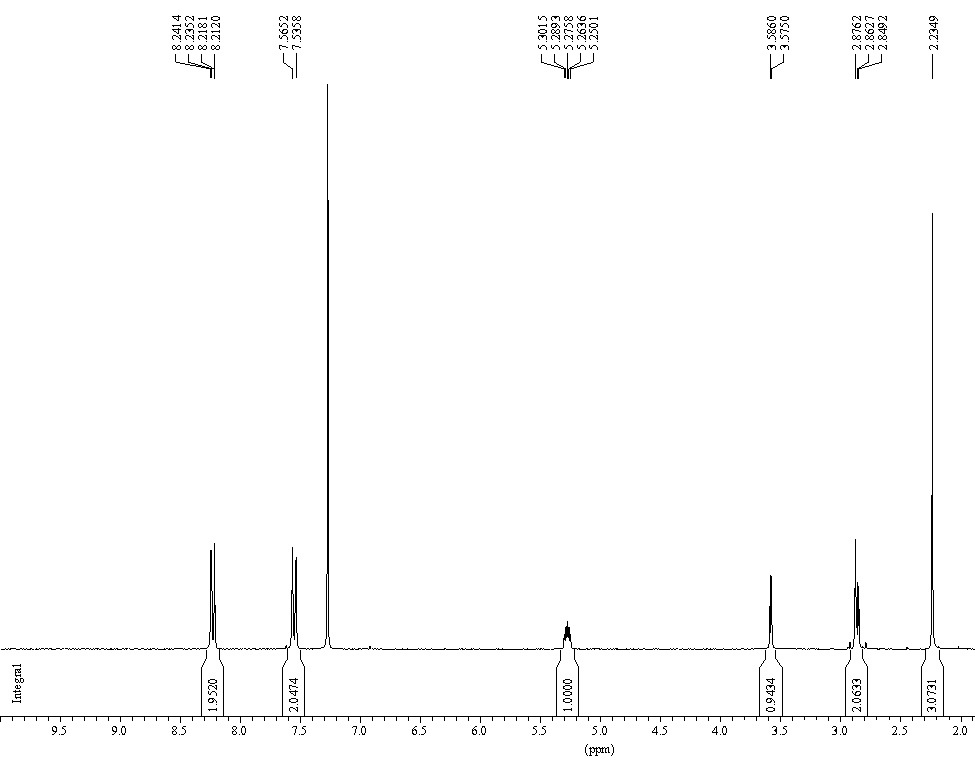


Figure 1S. 1H-NMR (CDCl3) of the crude product 1 from the aldol reaction with 100% yield.


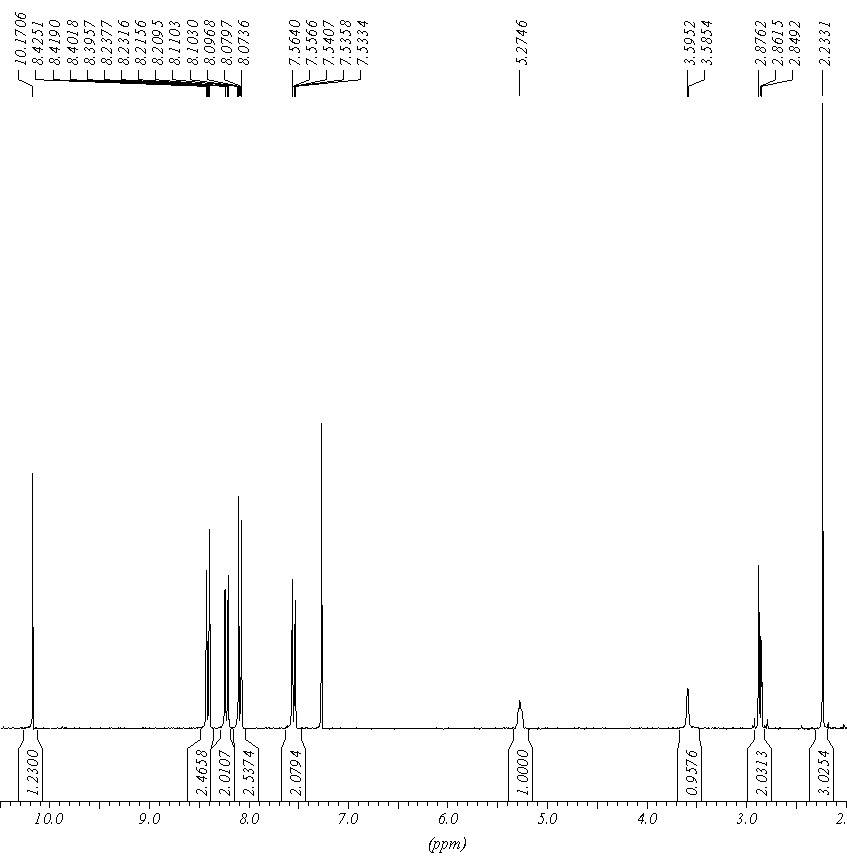


Figure 2S. 1H-NMR (CDCl3) of the aldol product 1 together with p-nitro benzaldehyde. The NMR yield calculated is 45%

Some relevant complex spectra

1H-NMR:


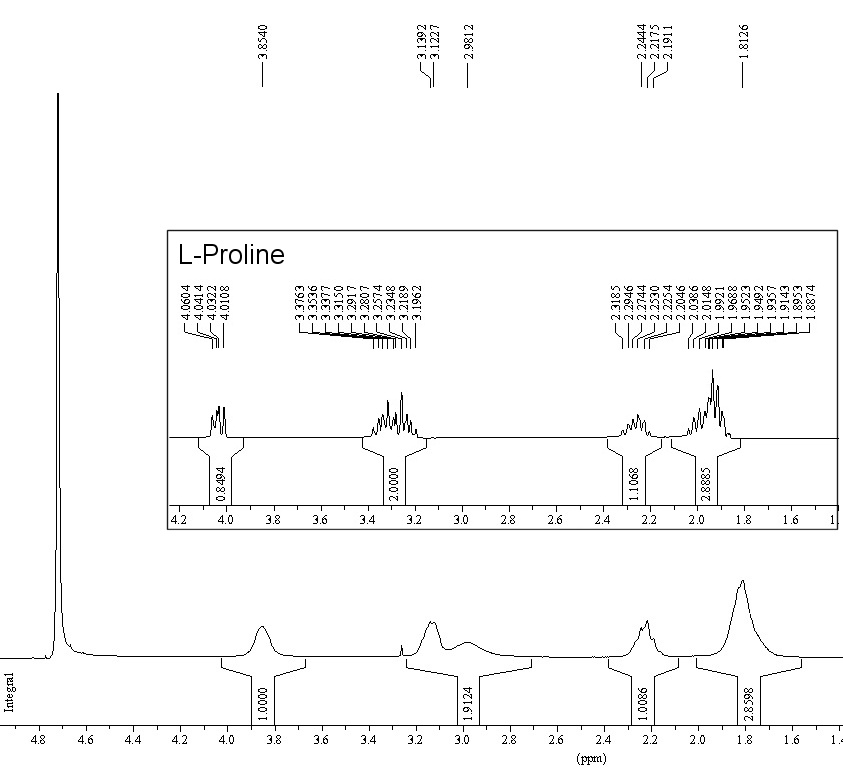


Figure 3S. 1H-NMR (D2O) of the complex L-Pro2Zn and L-Proline (box)


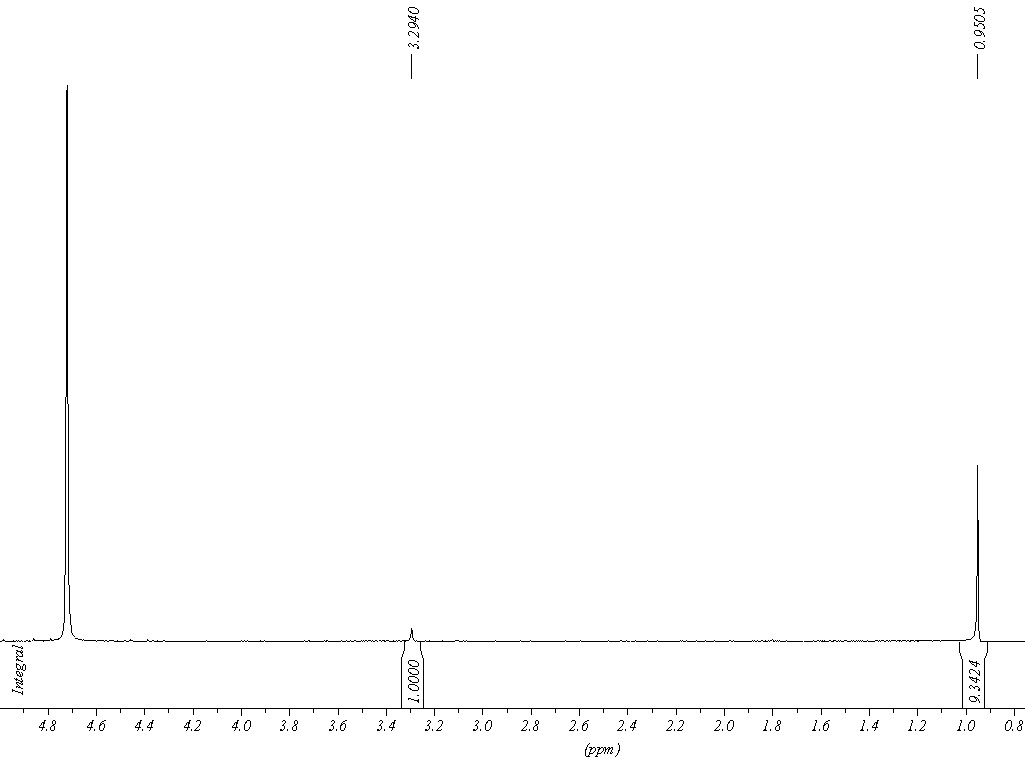


Figure 4S - 1H-NMR of the complex L-tert-Leu2Zn.


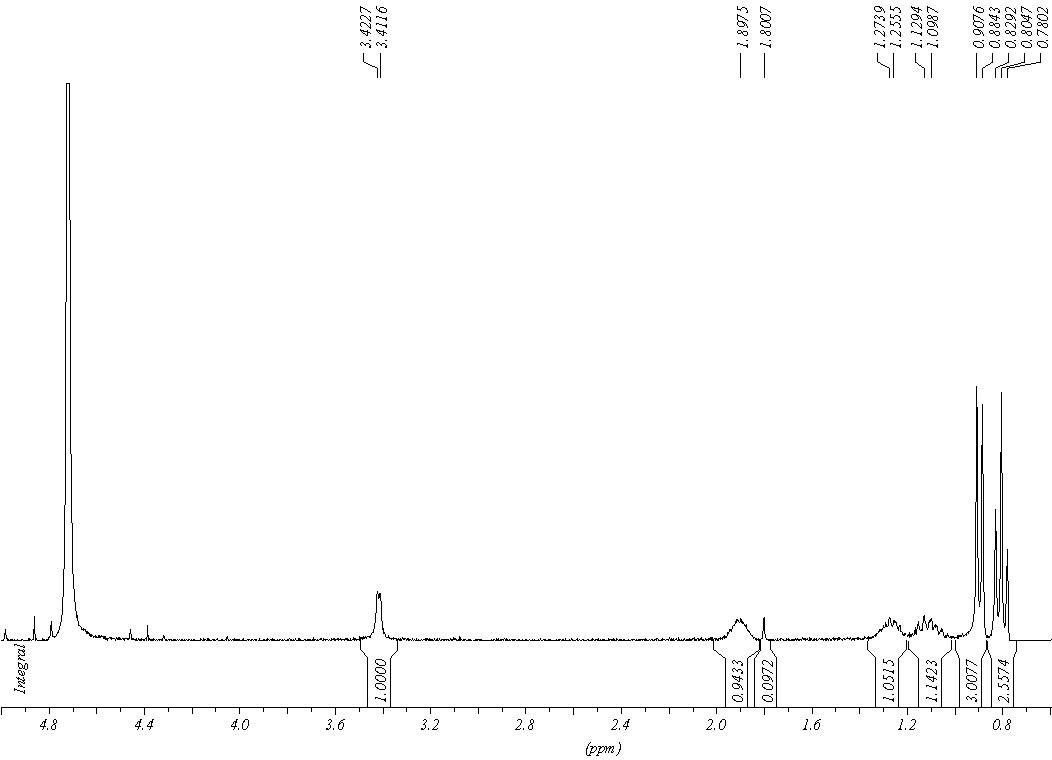


Figure 5S - 1H-NMR of the complex L-IsoLeu2Zn.

ESI-MS:


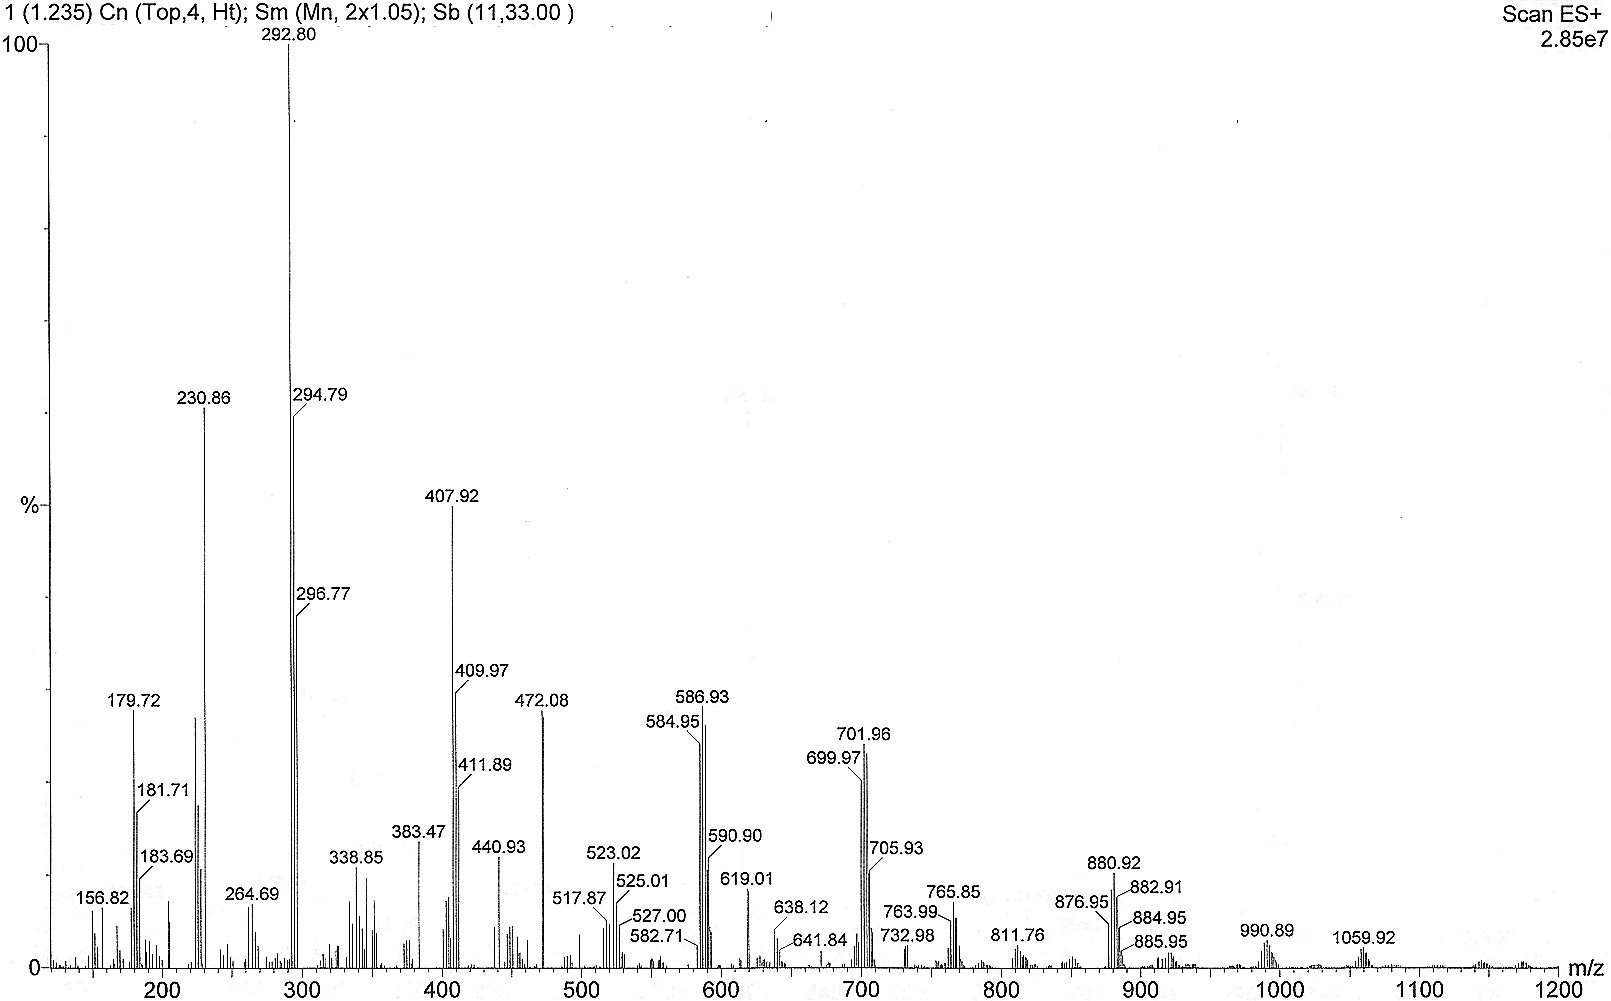


Figure 6S. ESI-MS of the complex L-Pro2Zn


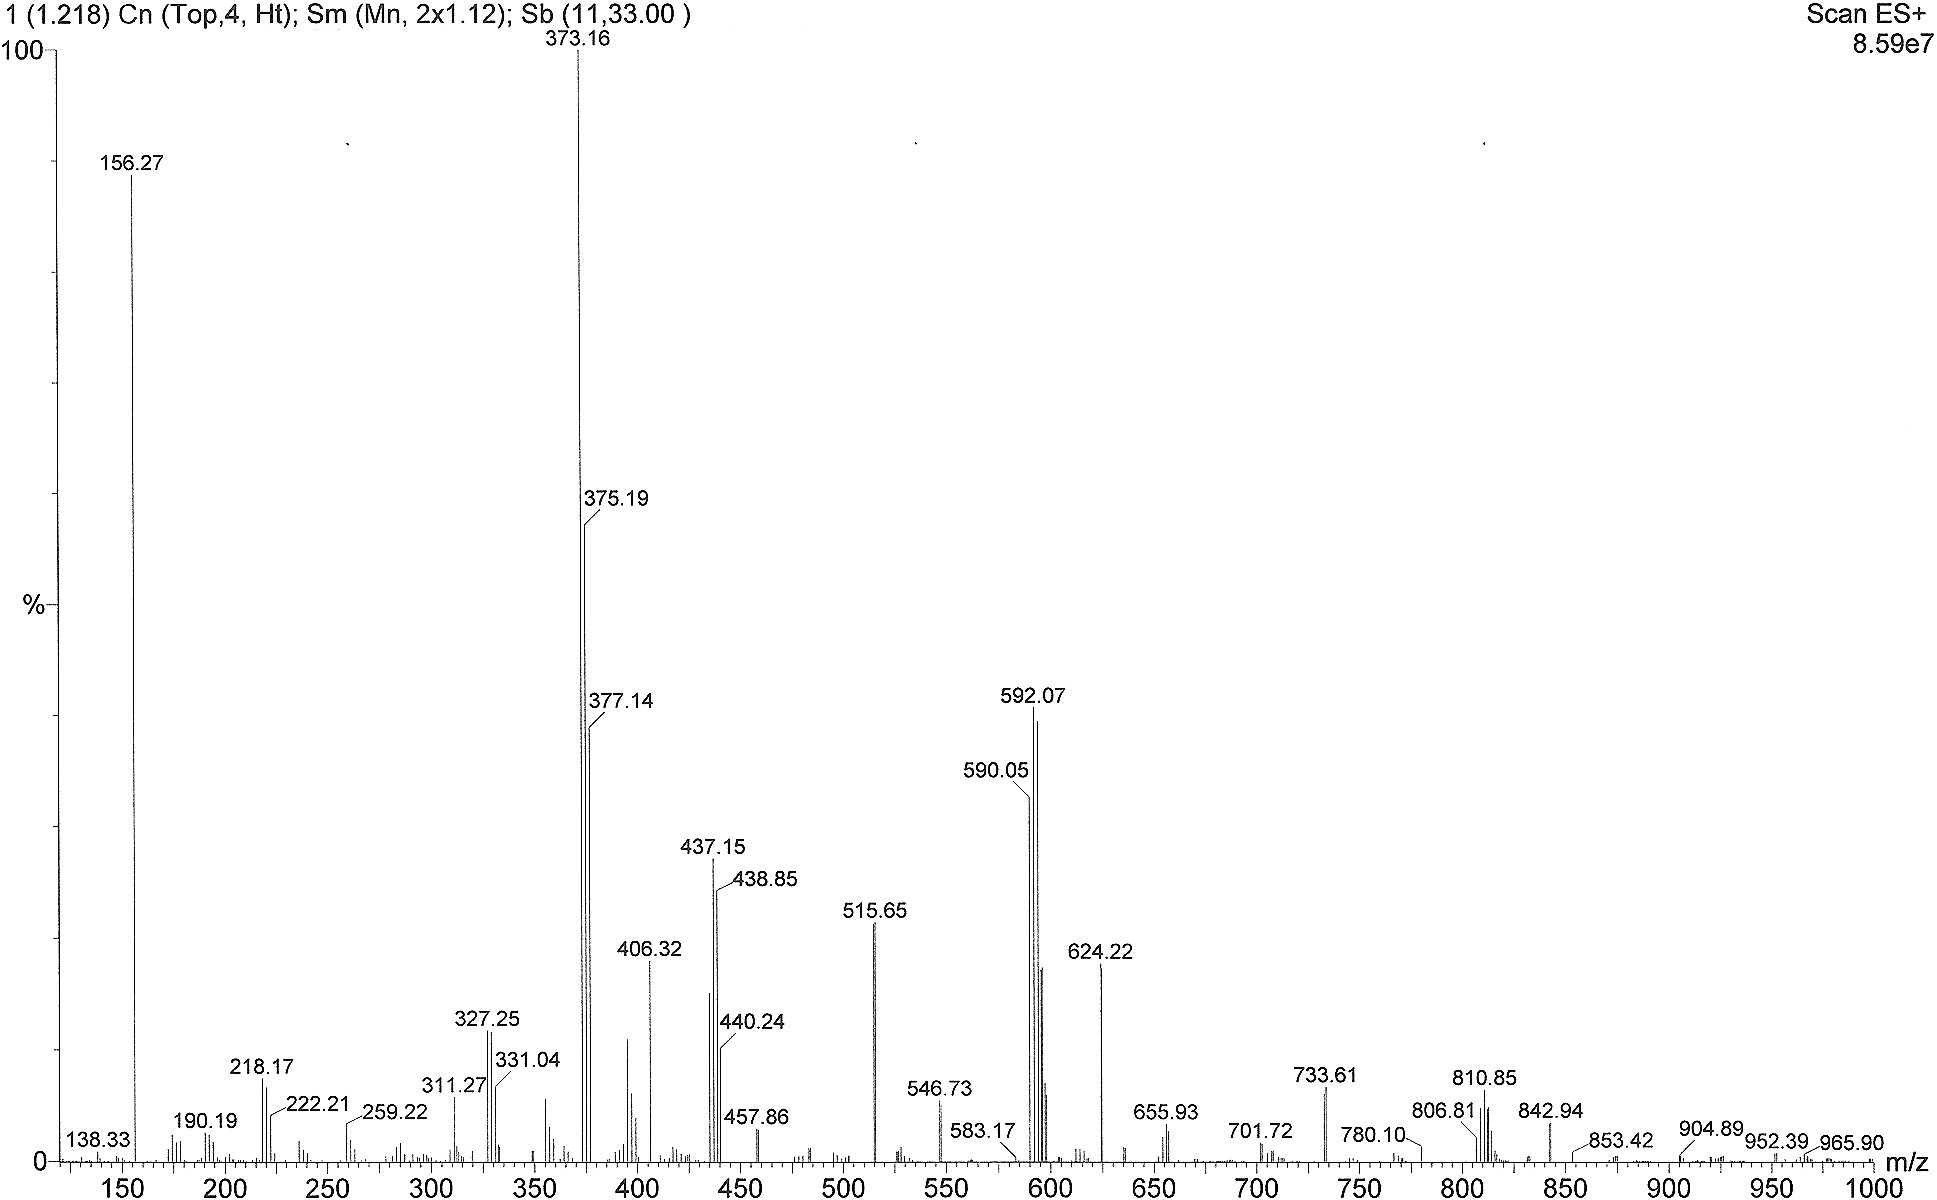


Figure 7S - ESI-MS of the complex L-His2Zn
